# Supplementary material for: Natural variability, radiative forcing and climate response in the recent hiatus reconciled
Source: Springer Nature journal article supplement (doi:10.1038/ngeo2228), 2014-08-17
Supplement: 41561_2014_BFngeo2228_MOESM301_ESM.pdf [file 41561_2014_BFngeo2228_MOESM301_ESM.pdf]

# Natural variability, radiative forcing and climate response in the recent hiatus reconciled

Markus Huber\* and Reto Knutti, Institute for Atmospheric and Climate Science, ETH Zurich

\*corresponding author: m.b.huber@reading.ac.uk

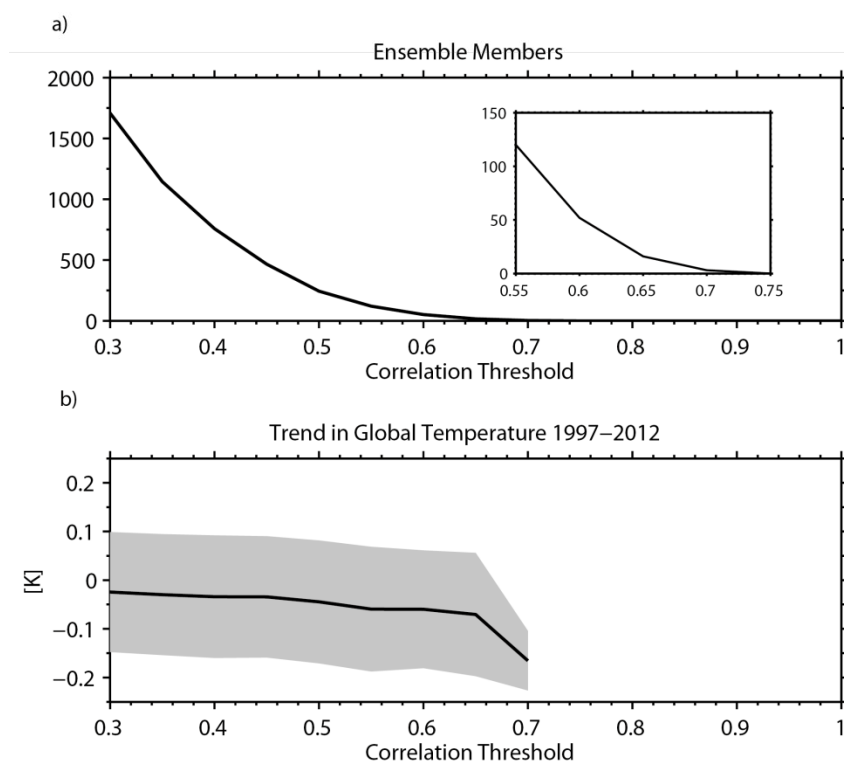

**Figure SM1. Sensitivity Analysis of the Trend in Global Temperature between 1997–2012 by the Variability Analogue Ensemble.** (a) Number of ensemble members in the analogue ensemble as a function the correlation threshold. (b) Mean trend of ensemble (solid black line) and  $\pm 1$  standard deviation (grey shading) of the trend in global temperature during that period as a function the correlation threshold.

| Model ID         | # of Years in Control Simulation | Trend in Control Simulation (corresponding to 15-year trend) | Number of Variability Analogues 1997-2012 |
|------------------|----------------------------------|--------------------------------------------------------------|-------------------------------------------|
| ACCESS1-0        | 500                              | 0.009839                                                     | 0                                         |
| ACCESS1-3        | 500                              | 0.00099948                                                   | 2                                         |
| bcc-csm1-1       | 500                              | -0.0011936                                                   | 1                                         |
| bcc-csm1-1-m     | 400                              | -0.0045845                                                   | 2                                         |
| CanESM2          | 996                              | -0.0013734                                                   | 3                                         |
| CCSM4            | 501                              | -0.0015225                                                   | 8                                         |
| CNRM-CM5         | 850                              | 0.0013615                                                    | 2                                         |
| CSIRO-Mk3-6-0    | 500                              | 0.0035939                                                    | 3                                         |
| EC-EARTH         | NaN                              | NaN                                                          | NaN                                       |
| GFDL-CM3         | 500                              | 0.015924                                                     | 0                                         |
| GFDL-ESM2G       | 500                              | -0.0014135                                                   | 2                                         |
| GFDL-ESM2M       | 500                              | 0.0033982                                                    | 2                                         |
| GISS-E2-H        | 780                              | 0.0016797                                                    | 1                                         |
| GISS-E2-R        | 850                              | 0.00035546                                                   | 1                                         |
| inmcm4           | 500                              | -0.0045767                                                   | 1                                         |
| IPSL-CM5A-LR     | 1000                             | 0.00090359                                                   | 2                                         |
| IPSL-CM5A-MR     | 300                              | 0.0024478                                                    | 0                                         |
| IPSL-CM5B-LR     | 300                              | 0.018394                                                     | 0                                         |
| MIROC5           | NaN                              | NaN                                                          | NaN                                       |
| MPI-ESM-LR       | 1000                             | 0.00025381                                                   | 1                                         |
| MPI-ESM-MR       | 1000                             | 0.0002858                                                    | 0                                         |
| MPI-ESM-P        | 1156                             | 6.0547e-06                                                   | 2                                         |
| MRI-CGCM3        | NaN                              | NaN                                                          | NaN                                       |
| NorESM1-M        | 501                              | 0.0011079                                                    | 4                                         |
| NorESM1-ME       | 252                              | 0.00051736                                                   | 3                                         |
| CESM1-CAM5       | 319                              | 0.0030175                                                    | 3                                         |
| CESM1-FASTCHEM   | 222                              | 0.00017286                                                   | 0                                         |
| CESM1-WACCM      | 200                              | -0.00061519                                                  | 0                                         |
| FIO-ESM          | 800                              | -0.0025342                                                   | 1                                         |
| CESM1-BGC        | 500                              | -0.00079352                                                  | 2                                         |
| CMSS-CMS         | 500                              | 0.0015202                                                    | 4                                         |
| BNU-ESM          | NaN                              | NaN                                                          | NaN                                       |
| CESM1-CAM5-1-FV2 | 50                               | 0.012528                                                     | 0                                         |
| CMCC-CESM        | 277                              | -0.0037811                                                   | 0                                         |
| CMCC-CM          | 330                              | -0.0070111                                                   | 0                                         |
| FGOALS-s2        | 500                              | -0.0065696                                                   | 1                                         |
| GISS-E2-H-CC     | 251                              | 0.0041443                                                    | 0                                         |
| GISS-E2-R-CC     | 251                              | -6.8215e-05                                                  | 0                                         |
| HadGEM2-ES       | 575                              | 0.0050108                                                    | 1                                         |
| HadGEM2-CC       | 240                              | -0.010138                                                    | 0                                         |

**Table SM1: Overview of CMIP5 climate models used in this study.** For each model, the model identifier is given along with the number of available years of the control simulation, the model drift in the control simulation as well as the number of variability analogues during for the 1997-2012 period. Grey shaded models were excluded of the analysis either due to a large model drift that exceeds the standard deviation across all models drifts or due to missing data.
